# Supplementary material for: Remediation of iron oxide bound Pb and Pb-contaminated soils using a combination of acid washing agents and l-ascorbic acid
Source: PubMed Central journal article supplement (PMC9057221; doi:10.1039/d0ra05327a), 2020-10-13
Supplement: RA-010-D0RA05327A-s001.pdf [file RA-010-D0RA05327A-s001.pdf]

### The form of Fe in solution and mineral

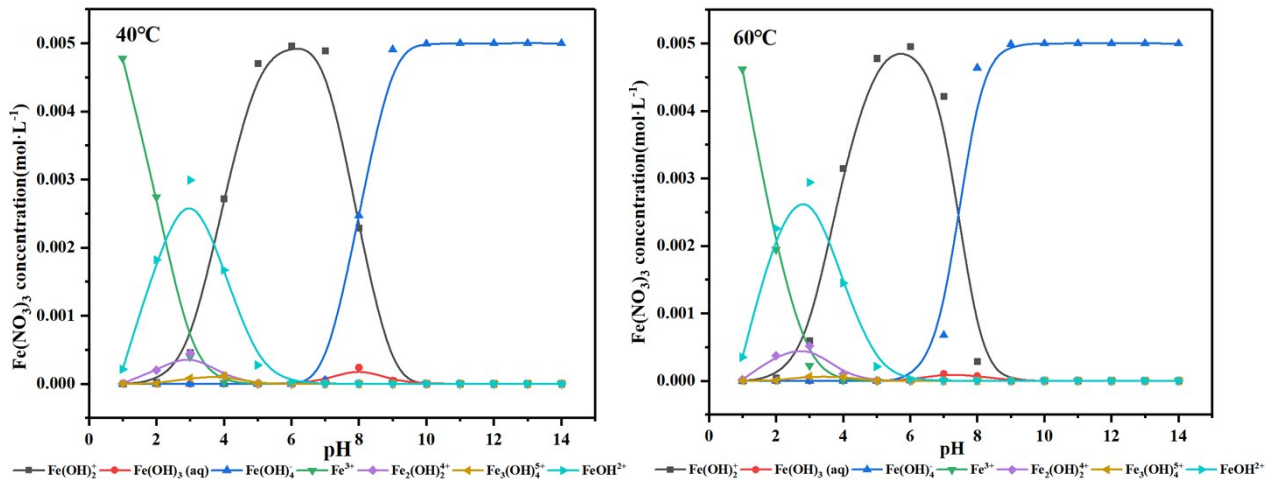

**Fig. 1s** Calculation results of the Fe(III) species distribution under variable pH conditions. Experiment conditions: concentration:  $0.005\text{ mol}\cdot\text{L}^{-1}$   $\text{Fe}(\text{NO}_3)_3$ , temperature:  $40^\circ\text{C}$  on the left,  $60^\circ\text{C}$  on the right, atmospheric pressure:  $101.325\text{ KPa}$ .

### Basic property of Pb-contaminated soils

**Table 1s** The Pb content and pH of the contaminated soils

| Contaminated soil no. | Total Pb (mg/kg) | pH   |
|-----------------------|------------------|------|
| 1                     | 4319.3           | 8.5  |
| 2                     | 2544.6           | 7.13 |

### Experimental conditions

**Table 2s** The detailed protocol for Pb washing experiments in mineral and soils

| Group | Additive variety                      | Factor                         |                                                          |                 |         |    |
|-------|---------------------------------------|--------------------------------|----------------------------------------------------------|-----------------|---------|----|
|       |                                       | Concentration /mol             | Liquid-solid ratio                                       | Temperature /°C | Time /h |    |
| 1     | Inorganic acid agent (HCl)            | 0.01, 0.05, 0.1, 0.2, 0.4, 0.8 | 20                                                       | 25              | 12      |    |
|       | Washing agents (Na <sub>2</sub> EDTA) | 0.01, 0.05, 0.1, 0.2, 0.4      | 20                                                       | 25              | 12      |    |
|       | organic acid agent (citric acid)      | 0.01, 0.05, 0.1, 0.2, 0.4, 0.8 | 20                                                       | 25              | 12      |    |
| 2     | Reductive agent selection             | NH <sub>2</sub> OH · HCl + HCl | NH <sub>2</sub> OH · HCl: 0, 0.04, 0.1<br>HCl: 0, 0.4, 1 | 20              | 60      | 12 |
|       |                                       | VC + HCl                       | VC: 0, 0.05, 0.1<br>HCl: 0, 0.4, 1                       | 20              | 60      | 12 |
|       |                                       |                                |                                                          | 20              | 60      | 12 |

|   |                              |                           |                                                                                                         |                                 |               |                             |
|---|------------------------------|---------------------------|---------------------------------------------------------------------------------------------------------|---------------------------------|---------------|-----------------------------|
| 3 | Mixed solution               | VC + HCl                  | VC: 0, 0.01, 0.02, 0.05,<br>0.08, 0.1, 0.2<br>HCl: 0.01, 0.05, 0.1, 0.2,<br>0.4, 0.8                    | 200                             | 60            | 12                          |
|   |                              | VC + Na <sub>2</sub> EDTA | VC: 0, 0.01, 0.02, 0.05,<br>0.08, 0.1, 0.2<br>Na <sub>2</sub> EDTA: 0.01, 0.03,<br>0.05, 0.08, 0.1, 0.2 | 200                             | 60            | 12                          |
|   |                              | VC + CA                   | VC: 0, 0.01, 0.02, 0.05,<br>0.08, 0.1, 0.2<br>CA: 0.01, 0.05, 0.1, 0.2,<br>0.4, 0.8                     | 200                             | 60            | 12                          |
| 4 | Liquid-solid ratio selection | VC + HCl                  | VC: 0.1<br>HCl: 0.1                                                                                     | 10, 25,<br>50, 100,<br>150, 200 | 60            | 12                          |
|   |                              | VC + Na <sub>2</sub> EDTA | VC: 0.05<br>Na <sub>2</sub> EDTA: 0.05                                                                  | 10, 25,<br>50, 100,<br>150, 200 | 60            | 12                          |
|   |                              | VC + CA                   | VC: 0.08<br>CA: 0.1                                                                                     | 10, 25,<br>50, 100,<br>150, 200 | 60            | 12                          |
| 5 | Temperature kinetics         | VC + HCl                  | VC: 0.1<br>HCl: 0.1                                                                                     | 150                             | 25, 40,<br>60 | 5 min, 10 min, 20 min,      |
|   |                              | VC + Na <sub>2</sub> EDTA | VC: 0.05<br>Na <sub>2</sub> EDTA: 0.05                                                                  | 200                             | 25, 40,<br>60 | 40 min, 1h, 1.5h, 2 h, 4 h, |
|   |                              | VC + CA                   | VC: 0.08<br>CA: 0.1                                                                                     | 150                             | 25, 40,<br>60 | 6 h, 8 h and 12 h           |
| 6 | Contaminated soils           | VC + HCl                  | 0.1 HCl, 0.1 HCl + 0.1VC,<br>0.4 HCl, 0.4 HCl + 0.05VC                                                  | 150                             | 60            | 12                          |
|   |                              | VC + Na <sub>2</sub> EDTA | 0.05 Na <sub>2</sub> EDTA, 0.05 VC +<br>0.05Na <sub>2</sub> EDTA                                        | 200                             | 60            | 12                          |
|   |                              | VC + CA                   | 0.1, 0.4                                                                                                | 150                             | 60            | 12                          |
|   |                              | VC                        | 0.05, 0.08, 0.1                                                                                         | 200                             | 60            | 12                          |

**Table 3s** The occurrence of Pb in the minerals (ug/g)

| Pb in the Mineral | Exchangeable | Carbonate-bound | Fe-Mn oxides-bound | Organic-bound | Residual | Total content |
|-------------------|--------------|-----------------|--------------------|---------------|----------|---------------|
| Pb                | 0.8          | 463.09          | 20052.03           | 581.79        | 12046.33 | 33144.11      |

**Washing experiment conditions and simulated results****Table 4s** The two reducing agents and concentrations on Pb removal efficiency

| Test NO. | Mineral mass (g) | The volume of the mixed solution (ml) | HCl concentration           | Reductant concentration                         | Temperature (°C) | Removal efficiency (%) | pH of the supernatant after washing |
|----------|------------------|---------------------------------------|-----------------------------|-------------------------------------------------|------------------|------------------------|-------------------------------------|
| EX-1     | 0.1              | 20                                    | 0.4 mol·L <sup>-1</sup> HCl | -                                               | 60               | 53.7                   | 0.56                                |
| EX-2     | 0.1              | 20                                    | -                           | 0.04 mol·L <sup>-1</sup> NH <sub>2</sub> OH·HCl | 60               | 23.6                   | 3.6                                 |
| EX-3     | 0.1              | 20                                    | 0.4 mol·L <sup>-1</sup> HCl | 0.04 mol·L <sup>-1</sup> NH <sub>2</sub> OH·HCl | 60               | 61.2                   | 0.56                                |
| EX-4     | 0.1              | 20                                    | 1 mol·L <sup>-1</sup> HCl   | 0.04 mol·L <sup>-1</sup> NH <sub>2</sub> OH·HCl | 60               | 88.8                   | 0.18                                |
| EX-5     | 0.1              | 20                                    | 0.4 mol·L <sup>-1</sup> HCl | 0.1 mol·L <sup>-1</sup> NH <sub>2</sub> OH·HCl  | 60               | 61.4                   | 0.55                                |
| EX-6     | 0.1              | 20                                    | -                           | 0.05 mol·L <sup>-1</sup> VC                     | 60               | 40.5                   | 3.77                                |
| EX-7     | 0.1              | 20                                    | 0.4 mol·L <sup>-1</sup> HCl | 0.05 mol·L <sup>-1</sup> VC                     | 60               | 90.3                   | 0.62                                |
| EX-8     | 0.1              | 20                                    | 1 mol·L <sup>-1</sup> HCl   | 0.05 mol·L <sup>-1</sup> VC                     | 60               | 98.6                   | 0.25                                |
| EX-9     | 0.1              | 20                                    | 0.4 mol·L <sup>-1</sup> HCl | 0.1 mol·L <sup>-1</sup> VC                      | 60               | 95.7                   | 0.62                                |

**Table 5s** Parameters of kinetics of Pb removal efficiency from iron oxide mineral to washing agents.

| Washing agent                              | Temperature (°C) | Pseudo-first-order(x-1) |                                                   |                             | Pseudo-second-order(x-2) |                                                   |                             |
|--------------------------------------------|------------------|-------------------------|---------------------------------------------------|-----------------------------|--------------------------|---------------------------------------------------|-----------------------------|
|                                            |                  | Q <sub>1</sub> (%)      | k <sub>1</sub> (% <sup>-1</sup> h <sup>-1</sup> ) | R <sub>1</sub> <sup>2</sup> | Q <sub>2</sub> (%)       | k <sub>2</sub> (% <sup>-1</sup> h <sup>-1</sup> ) | R <sub>2</sub> <sup>2</sup> |
| a<br>(0.1M HCl+0.1M VC)                    | 25               | 42.78                   | 1.1521                                            | 0.991*                      | 47.57                    | 0.0321                                            | 0.977*                      |
|                                            | 40               | 76.85                   | 2.5112                                            | 0.980*                      | 81.92                    | 0.0477                                            | 0.949*                      |
|                                            | 60               | 98.76                   | 3.9374                                            | 0.912*                      | 104.34                   | 0.0598                                            | 0.969*                      |
| b<br>(0.05M Na <sub>2</sub> EDTA+0.05M VC) | 25               | 45.52                   | 2.1323                                            | 0.980*                      | 49.01                    | 0.0646                                            | 0.967*                      |
|                                            | 40               | 70.61                   | 3.0720                                            | 0.982*                      | 75.07                    | 0.0630                                            | 0.969*                      |
|                                            | 60               | 98.59                   | 4.3372                                            | 0.939*                      | 103.55                   | 0.0687                                            | 0.964*                      |
| c<br>(0.08M CA+0.1M VC)                    | 25               | 47.49                   | 0.5176                                            | 0.958*                      | 58.05                    | 0.0090                                            | 0.935*                      |
|                                            | 40               | 65.51                   | 3.1804                                            | 0.942*                      | 69.88                    | 0.0683                                            | 0.975*                      |
|                                            | 60               | 95.21                   | 2.3004                                            | 0.805*                      | 101.62                   | 0.0371                                            | 0.925*                      |

\*Significant at P=0.01 level

**Table 6s** Experimental conditions of contaminated soils

| Group no.   | Acid washing agents<br>(mol·L <sup>-1</sup> ) | VC<br>(mol·L <sup>-1</sup> ) | Time<br>(h) |
|-------------|-----------------------------------------------|------------------------------|-------------|
| 1-untreated | -                                             | -                            | -           |
| 2           | 0.1mol·L <sup>-1</sup> CA                     | -                            | 12          |
| 3           | 0.1mol·L <sup>-1</sup> CA                     | 0.08                         | 12          |
| 4           | 0.4mol·L <sup>-1</sup> CA                     | -                            | 12          |
| 5           | 0.4mol·L <sup>-1</sup> CA                     | 0.05                         | 12          |
| 6           | 0.1mol·L <sup>-1</sup> HCl                    | -                            | 12          |
| 7           | 0.1mol·L <sup>-1</sup> HCl                    | 0.1                          | 12          |
| 8           | 0.4mol·L <sup>-1</sup> HCl                    | -                            | 12          |
| 9           | 0.4mol·L <sup>-1</sup> HCl                    | 0.05                         | 12          |
| 10          | 0.05mol·L <sup>-1</sup> Na <sub>2</sub> EDTA  | -                            | 12          |
| 11          | 0.05mol·L <sup>-1</sup> Na <sub>2</sub> EDTA  | 0.05                         | 12          |
| 12          | -                                             | 0.05                         | 12          |
| 13          | -                                             | 0.08                         | 12          |
| 14          | -                                             | 0.1                          | 12          |
